## Erratum

**Schlichting, K., Wilsch-Bräuninger, M., Demontis, F. and Dahmann, C. (2006).** Cadherin Cad99C is required for normal microvilli morphology in *Drosophila* follicle cells. *J. Cell Sci.* **119**, 1184-1195.

We apologize for an error that was introduced in Fig. 7 of the ePress version of this article. Panels E and F were missing from the figure.

The error only appeared in the ePress version of this article. The online and print versions are correct.
